# Supplementary material for: Impact of mobile health applications on self-management in patients with type 2 diabetes mellitus: protocol of a systematic review
Source: PubMed Central journal article supplement (PMC6597642; doi:10.1136/bmjopen-2018-025714), 2019-06-25
Supplement: bmjopen-2018-025714supp002.pdf [file bmjopen-2018-025714supp002.pdf]

## Supplementary File 2: Search Strategy for MEDLINE

| #  | Searches                                                                                 | Results |
|----|------------------------------------------------------------------------------------------|---------|
| 1  | Diabetes Mellitus, Type 2/                                                               | 119339  |
| 2  | ("type 2 diabet*" or "type II diabet*").ab,ti.                                           | 119790  |
| 3  | "type two diabet*".ab,ti.                                                                | 92      |
| 4  | T2D.ab,ti.                                                                               | 6227    |
| 5  | T2DM.ab,ti.                                                                              | 13579   |
| 6  | "non-insulin dependent diabetes".ab,ti.                                                  | 9053    |
| 7  | NIDDM.ab,ti.                                                                             | 7262    |
| 8  | "non insulin dependent diabetes".ab,ti.                                                  | 9053    |
| 9  | 1 or 2 or 3 or 4 or 5 or 6 or 7 or 8                                                     | 166578  |
| 10 | self care/ or blood glucose self-monitoring/ or self administration/ or self medication/ | 53908   |
| 11 | "self manag*".ab,ti.                                                                     | 15167   |
| 12 | "self-manag*".ab,ti.                                                                     | 15167   |
| 13 | "self treatment".ab,ti.                                                                  | 1208    |
| 14 | "self-treatment".ab,ti.                                                                  | 1208    |
| 15 | "self medication".ab,ti.                                                                 | 3165    |
| 16 | "self-medication".ab,ti.                                                                 | 3165    |
| 17 | "self administ*".ab,ti.                                                                  | 40755   |
| 18 | "self-administ*".ab,ti.                                                                  | 40755   |
| 19 | "self monitor*".ab,ti.                                                                   | 6891    |
| 20 | "self-monitor*".ab,ti.                                                                   | 6891    |
| 21 | "self care".ab,ti.                                                                       | 14797   |
| 22 | "self-care".ab,ti.                                                                       | 14797   |
| 23 | 10 or 11 or 12 or 13 or 14 or 15 or 16 or 17 or 18 or 19 or 20 or 21 or 22               | 107880  |
| 24 | Telemedicine/                                                                            | 16947   |
| 25 | mHealth.ab,ti.                                                                           | 1191    |
| 26 | m-Health.ab,ti.                                                                          | 217     |
| 27 | "mobile Health".ab,ti.                                                                   | 1495    |
| 28 | "mobile telephone*".ab,ti.                                                               | 480     |

|    |                                                                                                                                                                            |        |
|----|----------------------------------------------------------------------------------------------------------------------------------------------------------------------------|--------|
| 29 | "mobile phone".ab,ti.                                                                                                                                                      | 4160   |
| 30 | "cell phone*".ab,ti.                                                                                                                                                       | 2112   |
| 31 | "cell-phone*".ab,ti.                                                                                                                                                       | 2112   |
| 32 | "cellular phone*".ab,ti.                                                                                                                                                   | 733    |
| 33 | "cellphone*".ab,ti.                                                                                                                                                        | 198    |
| 34 | "smart phone*".ab,ti.                                                                                                                                                      | 663    |
| 35 | "smartphone*".ab,ti.                                                                                                                                                       | 4313   |
| 36 | "smart-phone*".ab,ti.                                                                                                                                                      | 663    |
| 37 | "handheld computer*".ab,ti.                                                                                                                                                | 506    |
| 38 | "hand-held computer*".ab,ti.                                                                                                                                               | 263    |
| 39 | "palmtop computer*".ab,ti.                                                                                                                                                 | 115    |
| 40 | "palm-top computer*".ab,ti.                                                                                                                                                | 41     |
| 41 | "tablet computer*".ab,ti.                                                                                                                                                  | 534    |
| 42 | "tablet PC".ab,ti.                                                                                                                                                         | 146    |
| 43 | "personal digital assistant*".ab,ti.                                                                                                                                       | 1139   |
| 44 | "mobile app*".ab,ti.                                                                                                                                                       | 1463   |
| 45 | "medical app*".ab,ti.                                                                                                                                                      | 8606   |
| 46 | Mobile Applications/                                                                                                                                                       | 2009   |
| 47 | "health app*".ab,ti.                                                                                                                                                       | 4203   |
| 48 | "handheld device*".ab,ti.                                                                                                                                                  | 574    |
| 49 | "hand-held device*".ab,ti.                                                                                                                                                 | 386    |
| 50 | cell phones/ or smartphone/                                                                                                                                                | 8548   |
| 51 | "mobile device*".ab,ti.                                                                                                                                                    | 1855   |
| 52 | "software app*".ab,ti.                                                                                                                                                     | 1721   |
| 53 | 24 or 25 or 26 or 27 or 28 or 29 or 30 or 31 or 32 or 33 or 34 or 35 or 36 or 37 or 38 or 39 or 40 or 41 or 42 or 43 or 44 or 45 or 46 or 47 or 48 or 49 or 50 or 51 or 52 | 50111  |
| 54 | 9 and 23 and 53                                                                                                                                                            | 343    |
| 55 | 23 or 53                                                                                                                                                                   | 155055 |
| 56 | 9 and 55                                                                                                                                                                   | 6574   |
